# Supplementary material for: Hunters or farmers? Microbiome characteristics help elucidate the diet composition in an aquatic carnivorous plant
Source: Microbiome. 2018 Dec 17;6:225. doi: 10.1186/s40168-018-0600-7 (PMC6297986; doi:10.1186/s40168-018-0600-7)
Supplement: Supplementary file 6 — Table S9. Results of the adonis analysis for U. australis and U.vulgaris prokaryotic community based on 16S rDNA gene sequencing. (PDF 459 kb) [file 40168_2018_600_MOESM6_ESM.pdf]

**Table S9:** Results of the adonis analysis for *U. australis* and *U.vulgaris* prokaryotic community based on 16S rDNA gene sequencing

| Group significance (adonis)                      | Df | SumsOfSqs | MeanSqs  | F.Model | R <sup>2</sup> | Pr(>F) | Signif.    |
|--------------------------------------------------|----|-----------|----------|---------|----------------|--------|------------|
| Plant ( <i>U.vulgaris</i> , <i>U.australis</i> ) | 1  | 0.77165   | 0.77165  | 15.48   | 0.38241        | 0.001  | ***        |
| <i>Residuals</i>                                 | 25 | 1.24622   | 0.04985  | 0.61759 |                |        |            |
| <i>Total</i>                                     | 26 | 2.01787   | 1.00000  |         |                |        |            |
| Age (young, medium, old)                         | 2  | 0.09585   | 0.047924 | 0.59842 | 0.0475         | 0.825  |            |
| <i>Residuals</i>                                 | 24 | 1.92202   | 0.080084 | 0.9525  |                |        |            |
| <i>Total</i>                                     | 26 | 2.01787   | 1.0000   |         |                |        |            |
| Treatment (trap,periphyton)                      | 1  | 0.07595   | 0.075945 | 0.9777  | 0.03764        | 0.341  |            |
| <i>Residuals</i>                                 | 25 | 1.94192   | 0.077677 | 0.96236 |                |        |            |
| <i>Total</i>                                     | 26 | 2.01787   | 1.00000  |         |                |        |            |
| codes:                                           | 0  | '***'     | 0.001    | '**'    | 0.01           | '*'    | 0.05 ' ' 1 |
